# Supplementary material
Source: PubMed Central journal article supplement (PMC8152573)
Supplement: NIHMS1698044-supplement-Appendix_of_tables_1-3.pdf [file NIHMS1698044-supplement-Appendix_of_tables_1-3.pdf]

**Table 1: Psychometric Property Definitions**

| <b>Psychometric Properties</b>        | <b>Definitions</b>                                                                            |
|---------------------------------------|-----------------------------------------------------------------------------------------------|
| Internal Consistency Reliability      | Scale items measure the same construct                                                        |
| Equivalence Reliability – Inter-rater | Consistency of different raters                                                               |
| Stability Reliability – Intra-rater   | Consistency of the same rater over time                                                       |
| Stability Reliability – Test-retest   | Consistency of the test over time                                                             |
| Sensitivity                           | Detects subtle differences, no floor or ceiling effects                                       |
| Sensitivity & Specificity             | Ratio of a true positive to a true negative test                                              |
| Content Validity                      | The content of a scale is representative of the intended conceptual domain.                   |
| Criterion Validity (2 types)          | Compared to a gold standard measure                                                           |
| - Concurrent Validity                 | The measure can estimate <u>present</u> performance on a criterion compared to gold standard. |
| - Predictive Validity                 | Estimates future performance of a gold standard                                               |
| Construct Validity (4 types)          | The measure relates to other measures consistent with theoretically derived hypotheses.       |
| - Convergent Validity                 | Correlation with similar measures                                                             |
| - Discriminant Validity               | No correlation between dissimilar measures                                                    |
| - Contrasting Group Validity          | Discriminates between contrasting groups                                                      |
| - Structural Validity                 | Scale items cluster related to a similar construct                                            |
| Responsiveness                        | Detects change over time                                                                      |
| Feasibility                           | Easy to use                                                                                   |

**Table 2. Sample Search Strategy in PubMed**

| Concept                  | Search terms                                                                                                                                                                                                                                                                                                                                                                                                                                                                                                                                                                                                                                                                                                                                                                                                                                                                                                    |
|--------------------------|-----------------------------------------------------------------------------------------------------------------------------------------------------------------------------------------------------------------------------------------------------------------------------------------------------------------------------------------------------------------------------------------------------------------------------------------------------------------------------------------------------------------------------------------------------------------------------------------------------------------------------------------------------------------------------------------------------------------------------------------------------------------------------------------------------------------------------------------------------------------------------------------------------------------|
| Peripheral Neurotoxicity | "peripheral neuropathy"[tw] OR neuropathic[tw] OR neurotoxicity[tw] OR CIPN[tw]                                                                                                                                                                                                                                                                                                                                                                                                                                                                                                                                                                                                                                                                                                                                                                                                                                 |
| Chemotherapy             | chemotherapy[tw] OR chemotherapies[tw] OR vincristine[tw] OR oncovin[tw] OR vinblastine[tw] OR vinorelbine[tw] OR vindesine[tw] OR vinorelbine[tw] OR "vinca alkaloid"[tw] OR "vinca alkaloids"[tw] OR oxaliplatin[tw] OR eloxatin[tw] OR cisplatin[tw] OR carboplatin[tw] OR platinum[tw] OR platinums[tw] OR taxane[tw] OR taxanes[tw] OR docetaxel[tw] OR paclitaxel[tw] OR ifosfamide[tw] OR ifex[tw] OR Ixabepilone[tw] OR epothilone[tw] OR Epothilones[tw] OR Bortezomib[tw] OR "proteasome inhibitor"[tw] OR "proteasome inhibitors"[tw] OR Thalidomide[tw] OR Lenalidomide[tw] OR procarbazine[tw] OR thiotepa[tw] OR podophyllin[tw] OR "topoisomerase inhibitor"[tw] OR teniposide[tw] OR etoposide[tw] OR vepesid[tw] OR vumon[tw] OR gemcitabine[tw] OR "Induction Chemotherapy"[Mesh] OR "Chemotherapy, Adjuvant"[Mesh] OR "Consolidation Chemotherapy"[Mesh] OR "Maintenance Chemotherapy"[Mesh] |
| Cancer                   | cancer[tw] OR oncology[tw] OR tumor[tw] OR tumour[tw] OR carcinoma[tw] OR malignancy[tw] OR malignancies[tw] OR malignant[tw] OR neoplas*[tw] OR "Neoplasms"[Mesh]                                                                                                                                                                                                                                                                                                                                                                                                                                                                                                                                                                                                                                                                                                                                              |
| Pediatrics               | Infant[MeSH] OR Infant[tw] OR Infants[tw] OR infancy[tw] OR Newborn[tw] OR Newborns[tw] OR Baby[tw] OR Babies[tw] OR Neonatal[tw] OR Neonate[tw] OR Child[MeSH] OR Child[tw] OR children[tw] OR Schoolchild OR "School age"[tw] OR Preschool*[tw] OR Kid[tw] OR kids[tw] OR Toddler*[tw] OR Adolescent[MeSH] OR Adolescent[tw] OR Adolescents[tw] OR Adolescence[tw] OR Teen[tw] OR teenager[tw] OR teens[tw] OR Boy[tw] OR boys[tw] OR Girl [tw] OR girls[tw] OR Minors[MeSH] OR Minors[tw] OR Pediatrics[MeSH] OR Pediatric[tw] OR Pediatrics[tw] OR Paediatrics[tw] OR youth[tw] OR "Young Adult"[Mesh] OR childhood[tw]                                                                                                                                                                                                                                                                                     |

Table 3: Summary of Pediatric CIPN Measurement Evidence

| Author and Year             | Study Design & Purpose                                                                                                                                                                | Sample & Setting                                                                                                                                                                                                                                                                                                                                                                                                                                                   | CIPN Measure | Methods                                                                                                                                                                                                                                                                                                                                                                                                                                                                                                                                                                                                                                                                                                                                                                                                                                                                                                                                                                                                                                                                                     | Reliability Results                                                                                                                                                                                                                                                                                                                                                            | Validity Results                                                                                                                                                                                                                                                 | Sensitivity, Responsiveness & Feasibility Results                                                                                                                                                                                                                                                                                                                                                                                                                                                                                                                                             | Limitations                                                                                                                                                                                                                                                                                                                                                                                                                                                                                                                                                                                                                                                                                                                                                                                                                            |
|-----------------------------|---------------------------------------------------------------------------------------------------------------------------------------------------------------------------------------|--------------------------------------------------------------------------------------------------------------------------------------------------------------------------------------------------------------------------------------------------------------------------------------------------------------------------------------------------------------------------------------------------------------------------------------------------------------------|--------------|---------------------------------------------------------------------------------------------------------------------------------------------------------------------------------------------------------------------------------------------------------------------------------------------------------------------------------------------------------------------------------------------------------------------------------------------------------------------------------------------------------------------------------------------------------------------------------------------------------------------------------------------------------------------------------------------------------------------------------------------------------------------------------------------------------------------------------------------------------------------------------------------------------------------------------------------------------------------------------------------------------------------------------------------------------------------------------------------|--------------------------------------------------------------------------------------------------------------------------------------------------------------------------------------------------------------------------------------------------------------------------------------------------------------------------------------------------------------------------------|------------------------------------------------------------------------------------------------------------------------------------------------------------------------------------------------------------------------------------------------------------------|-----------------------------------------------------------------------------------------------------------------------------------------------------------------------------------------------------------------------------------------------------------------------------------------------------------------------------------------------------------------------------------------------------------------------------------------------------------------------------------------------------------------------------------------------------------------------------------------------|----------------------------------------------------------------------------------------------------------------------------------------------------------------------------------------------------------------------------------------------------------------------------------------------------------------------------------------------------------------------------------------------------------------------------------------------------------------------------------------------------------------------------------------------------------------------------------------------------------------------------------------------------------------------------------------------------------------------------------------------------------------------------------------------------------------------------------------|
| Gilchrist 2009 <sup>1</sup> | <p><b>Design:</b> Descriptive, prospective, cross-sectional correlational</p> <p><b>Purpose:</b> Develop the ped-mTNS and test feasibility for use in school-aged children</p>        | <p><u>Children with Cancer:</u> N= 20</p> <ul style="list-style-type: none"> <li>- 55% ALL</li> <li>- 25% lymphoma</li> <li>- 20% solid tumors</li> </ul> <p>- Ages 5-18 years old: <math>\bar{X}</math> age = 10.6 years</p> <ul style="list-style-type: none"> <li>- 85% received vincristine, 15% cisplatin</li> </ul> <p>Therapy: 85% had been receiving vincristine or cisplatin for &gt;30 days; 15% had been off therapy for <math>\leq</math> 2 months</p> | ped-mTNS     | <p>Pilot study involving the modification of adult TNS to develop pediatric ped-mTNS. A single examiner administered ped-mTNS once using standard symptom questions, assessment of pin sensibility (Medipin), vibration sensation (Rydel-Seiffer tuning fork and biothesiometer), strength (MRC scale), and deep tendon reflexes.</p> <p><b>Reliability:</b> internal consistency assessed via Spearman inter-item correlations.</p> <p><b>Feasibility:</b> assessed via patient participation rate, administration time, and providers' ability to complete scale items.</p> <p><b>Face validity:</b> One neurologist evaluated the appropriateness of the content and scoring rubric of the interview and 4-part neurologic exam for children ages 5-18. Experts clinicians (N = 3) evaluated the content of the pediatric-mTNS and the ability to perform the test in the clinic among children ages 5-18.</p> <p><b>Construct Validity:</b> assessed via Spearman correlations between two vibration sensation assessment techniques (Rydel-Seiffer tuning fork and Biothesiometer)</p> | <p><b>Reliability:</b> Pin and vibration sensibility scores did not correlate with each other (<math>r = -0.285</math>) or with sensory symptoms (<math>r = -0.142, 0.126</math>, respectively).</p> <p>Motor symptoms were moderately correlated with strength (<math>r = 0.544</math>), DTRs (<math>r = 0.456</math>), and vibration sensation (<math>r = 0.613</math>).</p> | <p><b>Face validity:</b> Results not reported</p> <p><b>Construct validity:</b> Convergent validity was demonstrated when comparing tuning fork to biothesiometer scores, which were moderately correlated (<math>r = -0.72</math> at finger, -0.63 at toe).</p> | <p><b>Sensitivity:</b> Possible floor effects for items with scores that did not encompass the entire 0-4 range (sensory and motor symptoms, pin sensibility, deep tendon reflexes). Low mean scores 0.4 – 1.2) for 6 of the 7 ped-mTNS items.</p> <p><b>Sensitivity/Specificity:</b> The tuning fork identified more (+4) abnormalities than the biothesiometer.</p> <p>Tuning fork sensitivity = 1.0; specificity = 0.6.</p> <p><b>Responsiveness:</b> Not tested</p> <p><b>Feasibility:</b> Demonstrated via successful completion of all test items in &lt;10 minutes in all patients</p> | <ol style="list-style-type: none"> <li>1) Small sample size, lack of control group, single examiner</li> <li>2) 85% of participants received vincristine, limiting the generalizability of the findings</li> <li>3) Limited formal psychometric testing of reliability and validity</li> <li>4) Face validity methods and results not provided</li> <li>5) Limited assessment of sensitivity and specificity of individual items.</li> <li>6) Cross-sectional design prevented assessment of responsiveness to change.</li> <li>7) ped-mTNS examination procedures for evaluating light touch, pin sensation, strength, and reflexes varied from other published methods, and thus the findings may not be comparable across other studies</li> <li>8) Lack of control for obesity, steroid-induced myopathy, and genetics.</li> </ol> |
| Gilchrist 2013 <sup>2</sup> | <p><b>Design:</b> Descriptive, prospective, cross-sectional correlational, case control</p> <p><b>Purpose:</b> To investigate the reliability &amp; validity of the ped-mTNS as a</p> | <p><u>Children with Cancer:</u> N= 41</p> <ul style="list-style-type: none"> <li>- 23 ALL</li> <li>- 6 lymphoma,</li> <li>- 12 solid tumors</li> </ul> <p>- Ages 5-18 years old: <math>\bar{X}</math> age = 9.6 years</p> <ul style="list-style-type: none"> <li>- 40 were receiving vincristine, 1</li> </ul>                                                                                                                                                     | ped-mTNS     | <p><b>Internal consistency reliability:</b> assessed with Cronbach's alpha and item-total score correlations</p> <p><b>Intra-rater reliability:</b> intraclass correlation coefficients were calculated using data from 10 patients who were tested twice by the same investigator using the ped-mTNS. There was <math>\geq 1</math></p>                                                                                                                                                                                                                                                                                                                                                                                                                                                                                                                                                                                                                                                                                                                                                    | <p><b>Internal consistency reliability:</b> The ped-m-TNS demonstrated acceptable internal consistency with no items scoring less than 0.3 on the corrected item-total</p>                                                                                                                                                                                                     | <p><b>Construct validity:</b> 1) Contrasting group validity was demonstrated based on a statistically significant difference in mean total ped-mTNS scores between children receiving neurotoxic chemotherapy and</p>                                            | <p><b>Sensitivity Analysis:</b></p> <ul style="list-style-type: none"> <li>- 9.8% of controls received score = 0 (lowest score)</li> <li>- No subjects or controls received the highest score of 32, suggesting that the instrument may have a floor effect.</li> </ul>                                                                                                                                                                                                                                                                                                                       | <ol style="list-style-type: none"> <li>1) Data regarding the sensitivity of individual item scores were not provided.</li> <li>2) 96% of participants received vincristine, limiting the generalizability of the findings</li> <li>3) Time between intra- and inter-rater reliability testing may have been too short to eliminate rater recall bias</li> </ol>                                                                                                                                                                                                                                                                                                                                                                                                                                                                        |

|                                                         |                                                                                                       |  |  |                                                                                                                                                                                                                                                                                                                                                                                                                                                                                                                                                                                                                                                                                                                                                                                            |                                                                                                                                                                                                                                                                                                                              |                                                                                                                                                                                                                                                                                                                                                                                                                                                                                                                                                                      |  |                                                                                                                                                                                                                                                                                                                                                                                                                                                                                                                                                                        |
|---------------------------------------------------------|-------------------------------------------------------------------------------------------------------|--|--|--------------------------------------------------------------------------------------------------------------------------------------------------------------------------------------------------------------------------------------------------------------------------------------------------------------------------------------------------------------------------------------------------------------------------------------------------------------------------------------------------------------------------------------------------------------------------------------------------------------------------------------------------------------------------------------------------------------------------------------------------------------------------------------------|------------------------------------------------------------------------------------------------------------------------------------------------------------------------------------------------------------------------------------------------------------------------------------------------------------------------------|----------------------------------------------------------------------------------------------------------------------------------------------------------------------------------------------------------------------------------------------------------------------------------------------------------------------------------------------------------------------------------------------------------------------------------------------------------------------------------------------------------------------------------------------------------------------|--|------------------------------------------------------------------------------------------------------------------------------------------------------------------------------------------------------------------------------------------------------------------------------------------------------------------------------------------------------------------------------------------------------------------------------------------------------------------------------------------------------------------------------------------------------------------------|
| measure of CIPN in school-aged children and adolescents | vincristine & cisplatin, 1 cisplatin<br><br><u>Gender- and age-matched controls:</u><br><i>n</i> = 41 |  |  | hour between the two tests.<br><br><u>Inter-rater reliability:</u> intraclass correlation coefficients were calculated using data from 10 patients who were assessed by two different trained physical therapists using the ped-mTNS. There was $\geq 1$ hour between the two tests.<br><u>Construct Validity:</u><br>1) Contrasting group validity: assessed by comparison of mean ped-mTNS scores from children receiving known neurotoxic chemotherapy and age- and gender-matched controls<br>2) Convergent validity: assessed based on the correlations between ped-mTNS scores and BOT2 measures of balance and manual dexterity.<br><u>Sensitivity Analysis (ceiling and floor effects):</u> assessed based on the number of cases receiving the lowest and highest ped-mTNS score. | correlation and an overall Cronbach's alpha of 0.76.<br><u>Intra-rater reliability:</u> The ped-mTNS has acceptable intra-rater reliability based on an ICC of 0.99 (95 % CI 0.96–0.99).<br><u>Inter-rater reliability:</u> The ped-mTNS has acceptable inter-rater reliability based on an ICC of 0.98 (95 % CI 0.95–0.99). | controls (subjects, $8.7 \pm 4.2$ ; range: 2–18; controls, $1.4 \pm 0.9$ ; range: 0–4; $p < 0.001$ ). There were no significant differences in autonomic symptoms and pin sensibility item scores when comparing the two groups.<br>2) Convergent validity was demonstrated based on statistically significant negative associations among ped-mTNS mean scores and BOT2 balance ( $r$ range: 0–0.626, $p < 0.001$ ) and manual dexterity ( $r$ range: 0–0.461, $p < 0.001$ ).<br><br>No correlation between ped-mTNS total scores and cumulative vincristine dosage |  | 4) Use of the Biothesiometer to assess vibration thresholds limits the generalizability of the findings and feasibility for use in settings where this equipment is not available.<br><br>5) Cross-sectional design prevented assessment of responsiveness to change.<br><br>6) ped-mTNS examination procedures for evaluating light touch, pin sensation, strength, and reflexes varied from other published methods, and thus the findings may not be comparable across other studies<br><br>7) Lack of control for obesity, steroid-induced myopathy, and genetics. |
|---------------------------------------------------------|-------------------------------------------------------------------------------------------------------|--|--|--------------------------------------------------------------------------------------------------------------------------------------------------------------------------------------------------------------------------------------------------------------------------------------------------------------------------------------------------------------------------------------------------------------------------------------------------------------------------------------------------------------------------------------------------------------------------------------------------------------------------------------------------------------------------------------------------------------------------------------------------------------------------------------------|------------------------------------------------------------------------------------------------------------------------------------------------------------------------------------------------------------------------------------------------------------------------------------------------------------------------------|----------------------------------------------------------------------------------------------------------------------------------------------------------------------------------------------------------------------------------------------------------------------------------------------------------------------------------------------------------------------------------------------------------------------------------------------------------------------------------------------------------------------------------------------------------------------|--|------------------------------------------------------------------------------------------------------------------------------------------------------------------------------------------------------------------------------------------------------------------------------------------------------------------------------------------------------------------------------------------------------------------------------------------------------------------------------------------------------------------------------------------------------------------------|

|                                   |                                                                                                                                                                                                                                                                                                    |                                                                                                                                                                                                                                                                     |                                                                                                  |                                                                                                                                                                                                                                                                                                                                                                                                                                                                                                                                                                                                                                                                |           |                                                                                                                                                                                                                                                                                         |                                                                                                                                                                                                                                                                                                                                                                                                                                                                                                                                                                                                        |                                                                                                                                                                                                                                                                                                                                                                                                                                                                                                                                                                                                                                                                                                                                                                                                                      |
|-----------------------------------|----------------------------------------------------------------------------------------------------------------------------------------------------------------------------------------------------------------------------------------------------------------------------------------------------|---------------------------------------------------------------------------------------------------------------------------------------------------------------------------------------------------------------------------------------------------------------------|--------------------------------------------------------------------------------------------------|----------------------------------------------------------------------------------------------------------------------------------------------------------------------------------------------------------------------------------------------------------------------------------------------------------------------------------------------------------------------------------------------------------------------------------------------------------------------------------------------------------------------------------------------------------------------------------------------------------------------------------------------------------------|-----------|-----------------------------------------------------------------------------------------------------------------------------------------------------------------------------------------------------------------------------------------------------------------------------------------|--------------------------------------------------------------------------------------------------------------------------------------------------------------------------------------------------------------------------------------------------------------------------------------------------------------------------------------------------------------------------------------------------------------------------------------------------------------------------------------------------------------------------------------------------------------------------------------------------------|----------------------------------------------------------------------------------------------------------------------------------------------------------------------------------------------------------------------------------------------------------------------------------------------------------------------------------------------------------------------------------------------------------------------------------------------------------------------------------------------------------------------------------------------------------------------------------------------------------------------------------------------------------------------------------------------------------------------------------------------------------------------------------------------------------------------|
| <p>Gilchrist 2014<sup>3</sup></p> | <p><u>Design:</u><br/>Descriptive, prospective cross-sectional correlational<br/><u>Purpose:</u><br/>Comparison of CTCAE v.3.0 and ped-mTNS scales' sensitivity and specificity, and assessment of CTCAE construct validity when compared to the ped-mTNS</p>                                      | <p><u>Children with Cancer:</u> <math>N = 60</math><br/>- 50% ALL<br/>- 23.3% lymphoma<br/>- 26.7% solid tumors<br/>- Ages 5-18 years old: <math>\bar{X}</math> age = 10.7 years<br/>-59 were receiving vincristine, 3 cisplatin, 2 vincristine &amp; cisplatin</p> | <p>ped-mTNS, CTCAE v.3.0 (retrospectively abstracted from clinical notes by a trained rater)</p> | <p>A single ped-mTNS assessment was carried out following chemotherapy administration (3-4 months post commencement in solid tumors or lymphoma, 2 weeks post delayed intensification treatment phase in ALL) followed by clinical review within 24 hours. CTCAE scores were retrospectively obtained by a single trained abstractor, based on medical notes taken at the clinical review.<br/><u>Specificity and sensitivity:</u> based on motor and sensory CTCAE score comparisons to ped-mTNS strength and light touch items<br/><u>Construct Validity:</u> Assessed based on the correlation between combined sensory/motor CTCAE and ped-mTNS scores</p> | <p>NA</p> | <p><u>Construct validity:</u><br/>Convergent validity: There was no correlation between ped-mTNS scores and combined motor and sensory CTCAE scores. The only ped-mTNS item that correlated to CTCAE scores was strength testing (<math>r = 0.43</math>; <math>p &lt; 0.01</math>).</p> | <p><u>Sensitivity ped-mTNS:</u><br/>- Detected more patients with neurotoxicity than the CTCAE.<br/>- 84% of patients receiving a combined score of 0 on CTCAE demonstrated a score of <math>\geq 5</math> on the ped-mTNS.<br/><u>Sensitivity/Specificity Sensory CTCAE:</u><br/>- Compared to light touch evaluation, sensitivity = 0., specificity = 0.8<br/>- Failed to detect sensory neurotoxicity in 40%<br/><u>Sensitivity/Specificity of Motor CTCAE:</u><br/>- Compared to manual muscle testing, sensitivity = 0.7, specificity = 1.0<br/>- Failed to detect motor neurotoxicity in 15%</p> | <ol style="list-style-type: none"> <li>1) Lack of prospective CTCAE grading</li> <li>2) 59 of 60 participants received vincristine, limiting the generalizability of the findings</li> <li>3) Site-specific idiosyncrasies (such as automatic referral practices for ankle foot orthoses) which may affect the documentation of neurotoxicity in the medical record, and the subsequently derived CTCAE grades.</li> <li>4) Cross-sectional design prevented assessment of responsiveness to change.</li> <li>5) ped-mTNS examination procedures for evaluating light touch, pin sensation, strength, and reflexes varied from other published methods, and thus the findings may not be comparable across other studies</li> <li>6) Lack of control for obesity, steroid-induced myopathy, and genetics.</li> </ol> |
| <p>Gilchrist 2018<sup>4</sup></p> | <p><u>Design:</u><br/>Descriptive, prospective longitudinal, correlational<br/><u>Purpose:</u><br/>Although not designed as an instrument development study, one aim was to explore the association between CIPN and balance impairment using the ped-mTNS and an established balance measure.</p> | <p><u>Children with Cancer:</u> <math>N = 86</math><br/>- 28 ALL<br/>- 32 lymphoma<br/>- 26 solid tumors<br/>- Ages 5-18 years old: <math>\bar{X}</math> age = 10.0 years<br/>-65 were receiving vincristine, 2 bortezomib</p>                                      | <p>ped-mTNS, BOT-2 balance items</p>                                                             | <p>Longitudinal evaluations of balance were carried out at different time points, given different treatment schedules. ALL patients were first evaluated within 2 weeks of the end of delayed intensification (6 months into treatment), lymphoma and solid tumors within 3 months after treatment initiation. At 6 months a follow-up evaluation was performed.<br/><u>BOT-2 was administered according to standard procedures. Neurotoxicity was evaluated via ped-mTNS.</u><br/><u>Concurrent validity:</u> assessed via Spearman correlations between ped-mTNS and BOT-2 balance scores during and 6 months post chemotherapy treatment</p>                | <p>NA</p> | <p><u>Construct validity:</u><br/>Convergent validity: ped-mTNS and BOT-2 scores during treatment were moderately correlated during (<math>r = -0.34</math>; <math>p = .005</math>) and 6 months post-chemotherapy treatment (<math>r = -0.31</math>; <math>p = .01</math>)</p>         | <p>NA</p>                                                                                                                                                                                                                                                                                                                                                                                                                                                                                                                                                                                              | <ol style="list-style-type: none"> <li>1) No control for non-CIPN causes of balance deficits (e.g., cranial radiation, intrathecal chemotherapy, limited ankle range of motion, steroid myopathy</li> <li>2) 65 of 86 participants received vincristine, limiting the generalizability of the findings</li> <li>3) 24% drop-out rate</li> <li>4) ped-mTNS examination procedures for evaluating light touch, pin sensation, strength, and reflexes varied from other published methods, and thus the findings may not be comparable across other studies</li> <li>5) Lack of control for obesity, steroid-induced myopathy, and genetics.</li> </ol>                                                                                                                                                                 |

|                          |                                                                                                                                                                                                                                         |                                                                                                                                                                                                                                                                                                                                  |                             |                                                                                                                                                                                                                                                                                                                                                                                                                                                                                                                                                                                                                                                                                                                                                                                   |    |                                                                                                                                                                                                                                                                                                                                                                                                       |                                                                                                                                                                                                                                                                                                                                                                                                                                                                                                      |                                                                                                                                                                                                                                                                                                                                                                                                                                                                                                     |
|--------------------------|-----------------------------------------------------------------------------------------------------------------------------------------------------------------------------------------------------------------------------------------|----------------------------------------------------------------------------------------------------------------------------------------------------------------------------------------------------------------------------------------------------------------------------------------------------------------------------------|-----------------------------|-----------------------------------------------------------------------------------------------------------------------------------------------------------------------------------------------------------------------------------------------------------------------------------------------------------------------------------------------------------------------------------------------------------------------------------------------------------------------------------------------------------------------------------------------------------------------------------------------------------------------------------------------------------------------------------------------------------------------------------------------------------------------------------|----|-------------------------------------------------------------------------------------------------------------------------------------------------------------------------------------------------------------------------------------------------------------------------------------------------------------------------------------------------------------------------------------------------------|------------------------------------------------------------------------------------------------------------------------------------------------------------------------------------------------------------------------------------------------------------------------------------------------------------------------------------------------------------------------------------------------------------------------------------------------------------------------------------------------------|-----------------------------------------------------------------------------------------------------------------------------------------------------------------------------------------------------------------------------------------------------------------------------------------------------------------------------------------------------------------------------------------------------------------------------------------------------------------------------------------------------|
| Lieber 2018 <sup>5</sup> | <p><b>Design:</b><br/>Cross-sectional, observational study</p> <p><b>Purpose:</b><br/>To compare quantitative sensory testing (QST) to nerve conduction studies (NCS) and rPed-mTNS© and assess correlations with CIPN risk factors</p> | <p><b>Children with Cancer from 2 study centers:</b><br/>N=46<br/>- ALL diagnosis<br/>- Ages 6-18 years old: <math>\bar{X}</math> age = 9.8 years<br/>- Vincristine treatment completed<br/>- Sample included patients 3 months to 10 years post treatment.</p> <p>Therapy:<br/>&gt;12mg/m<sup>2</sup> vincristine treatment</p> | Reduced Ped-mTNS©, NCS, QST | <p>A single assessment was undertaken using QST protocol, nerve conduction velocity of sensory nerves, and reduced ped-mTNS© (r-Ped-mTNS©: 5 of 8 items only, omitted vibration, light touch and pinprick items).</p> <p><b>Construct validity:</b> evaluated by testing the correlations between the CIPN measures and known risk factors for developing CIPN (i.e., age at diagnosis, gender, and time interval after completion of chemotherapy).</p> <p><b>Contrasting group validity:</b> assessed by comparing mean QST parameter scores from cases to published normal reference values</p> <p><b>Sensitivity/Specificity:</b> QST parameters (vibration and mechanical detection thresholds) were compared to r-Ped-mTNS© and sensory nerve conduction velocity (NCV)</p> | NA | <p><b>Construct validity:</b><br/>Neither QST parameters, NCV, nor rPed-mTNS© correlated with known risk factors for developing CIPN (i.e., age at diagnosis, gender, time since last chemotherapy).</p> <p><b>Contrasting group validity:</b> Mean scores for several QST parameters were worse than published mean reference scores from healthy controls (<i>p</i> range 0.019 to &lt; 0.0001)</p> | <p><b>Sensitivity/Specificity of QST:</b><br/>- QST parameters vibration and mechanical sensation tests were sensitive (detected true positive finding) in 86% and 57% of patients with slowed NCV.<br/>- QST detected true negative vibration and mechanical detection abnormalities in 31% and 36%, respectively</p> <p><b>Sensitivity/Specificity of r-Ped-mTNS©:</b><br/>- Detected true positive in 29% of patients with slowed NCV.<br/>- rPed-mTNS detected true negative findings in 67%</p> | <p>1) r-Ped-mTNS© omits all objective sensory testing and only leaves symptom report, weakness and deep tendon reflexes.</p> <p>2) QST findings were compared to sensory nerve conduction velocity testing, which is not a valid measure of vincristine-associated sensory and motor function abnormalities</p> <p>3) Small sample</p> <p>4) Lengthy QST battery that requires patient attention and cooperation</p> <p>5) Lack of control for obesity, steroid-induced myopathy, and genetics.</p> |
|--------------------------|-----------------------------------------------------------------------------------------------------------------------------------------------------------------------------------------------------------------------------------------|----------------------------------------------------------------------------------------------------------------------------------------------------------------------------------------------------------------------------------------------------------------------------------------------------------------------------------|-----------------------------|-----------------------------------------------------------------------------------------------------------------------------------------------------------------------------------------------------------------------------------------------------------------------------------------------------------------------------------------------------------------------------------------------------------------------------------------------------------------------------------------------------------------------------------------------------------------------------------------------------------------------------------------------------------------------------------------------------------------------------------------------------------------------------------|----|-------------------------------------------------------------------------------------------------------------------------------------------------------------------------------------------------------------------------------------------------------------------------------------------------------------------------------------------------------------------------------------------------------|------------------------------------------------------------------------------------------------------------------------------------------------------------------------------------------------------------------------------------------------------------------------------------------------------------------------------------------------------------------------------------------------------------------------------------------------------------------------------------------------------|-----------------------------------------------------------------------------------------------------------------------------------------------------------------------------------------------------------------------------------------------------------------------------------------------------------------------------------------------------------------------------------------------------------------------------------------------------------------------------------------------------|

|                               |                                                                                                                                                                                                                                                                  |                                                                                                                                                                                                                                                                                                 |                                                                  |                                                                                                                                                                                                                                                                                                                                                                                                                                                                                                                                                                                                                                                                                                                                                                                                                                                                                                                                                                                                                                                                                                                                                                                                 |                                                                                                                                                                                                                                                                                                                                                                                                                                                                                                                                                                                          |                                                                                                                                                                                                                                                                                                                                                                                                                                                                                                                                                                                                                                                                                                                                                                                                                                                                 |                                                                                                                                                                                                                                                                                                                                                                                                                                                                                                                                                                                                                                                                                                                                                                                                                                                                                                                                                                                                                                                                                                                                                                                                                                                         |                                                                                                                                                                                                                                                                                                                                                                                                                                                                                                                                                  |
|-------------------------------|------------------------------------------------------------------------------------------------------------------------------------------------------------------------------------------------------------------------------------------------------------------|-------------------------------------------------------------------------------------------------------------------------------------------------------------------------------------------------------------------------------------------------------------------------------------------------|------------------------------------------------------------------|-------------------------------------------------------------------------------------------------------------------------------------------------------------------------------------------------------------------------------------------------------------------------------------------------------------------------------------------------------------------------------------------------------------------------------------------------------------------------------------------------------------------------------------------------------------------------------------------------------------------------------------------------------------------------------------------------------------------------------------------------------------------------------------------------------------------------------------------------------------------------------------------------------------------------------------------------------------------------------------------------------------------------------------------------------------------------------------------------------------------------------------------------------------------------------------------------|------------------------------------------------------------------------------------------------------------------------------------------------------------------------------------------------------------------------------------------------------------------------------------------------------------------------------------------------------------------------------------------------------------------------------------------------------------------------------------------------------------------------------------------------------------------------------------------|-----------------------------------------------------------------------------------------------------------------------------------------------------------------------------------------------------------------------------------------------------------------------------------------------------------------------------------------------------------------------------------------------------------------------------------------------------------------------------------------------------------------------------------------------------------------------------------------------------------------------------------------------------------------------------------------------------------------------------------------------------------------------------------------------------------------------------------------------------------------|---------------------------------------------------------------------------------------------------------------------------------------------------------------------------------------------------------------------------------------------------------------------------------------------------------------------------------------------------------------------------------------------------------------------------------------------------------------------------------------------------------------------------------------------------------------------------------------------------------------------------------------------------------------------------------------------------------------------------------------------------------------------------------------------------------------------------------------------------------------------------------------------------------------------------------------------------------------------------------------------------------------------------------------------------------------------------------------------------------------------------------------------------------------------------------------------------------------------------------------------------------|--------------------------------------------------------------------------------------------------------------------------------------------------------------------------------------------------------------------------------------------------------------------------------------------------------------------------------------------------------------------------------------------------------------------------------------------------------------------------------------------------------------------------------------------------|
| <p>Smith 2013<sup>6</sup></p> | <p><b>Design:</b> Multi-site, descriptive, prospective longitudinal, correlational<br/><b>Purpose:</b><br/>To examine the sensitivity, reliability, validity, responsiveness and clinical feasibility of several VIPN measures for use in children with ALL.</p> | <p><b>Children with Cancer from 4 academic centers:</b><br/>N=65<br/>- ALL diagnosis<br/>- 1-18 years:<br/><math>\bar{X}</math> age = 6.4 years</p> <p>Assessments: N = 806</p> <p>Therapy: 100% were receiving vincristine</p> <p>-Mean vincristine cumulative dosage = 12mg/m<sup>2</sup></p> | <p>TNS©-PV, NCI-CTCAE, Balis grading scale, FACES Pain Scale</p> | <p>TNS©-PV<sup>^</sup>, NCI-CTCAE, the Balis grading scale, and the FACES Pain Scale were obtained by trained assessors at baseline and with each vincristine dose over 15 weeks</p> <p>Blood was obtained at several time points to quantify pharmacokinetic Parameters (AUC).</p> <p><b>Sensitivity:</b> assessed via item and total scores means, ranges, and SDs<br/><b>Internal consistency reliability:</b> assessed with Cronbach's alpha and item-total score correlations<br/><b>Inter-rater reliability:</b> weighted kappa coefficients were calculated using TNS©-PV data from 19 patients who were assessed by a trained rater and a neurologist<br/><b>Construct Validity:</b><br/><b>Convergent validity:</b> assessed based on the Spearman <math>\rho</math> correlations among the TNS©-PV, Balis grading scale, NCI-CTCAE, and the FACES pain score, cumulative vincristine dose, and AUC<br/><b>Responsiveness:</b> assessed via Mann-Whitney tests of changes in mean scores over time from baseline to week 15 and effect size (<i>es</i>)<br/><b>Feasibility:</b> based on the % of VIPN assessments that were obtained in children <math>\leq</math> 3 years of age</p> | <p><b>Internal consistency reliability:</b> The Cronbach's <math>\alpha</math> for a reduced, 5-item TNS©-PV (i.e., worst subjective symptom, temperature, vibration, strength, and reflex items) was .84.</p> <p>Poor item-item correlations for laryngeal and constipation items (all <math>r &lt; 0.13</math>)</p> <p><b>Inter-rater reliability:</b> The TNS©-PV scores obtained by trained raters correlated moderately strongly with neurologist TNS©-PV scores (<math>Kw</math> range = 0.54-0.99) (<math>n = 13-19</math>) except paresthesia item (<math>Kw = 0.15</math>).</p> | <p><b>Construct validity:</b><br/><b>Convergent validity:</b> The TNS©-PV scores correlated with cumulative vincristine dosage (<math>r = 0.53</math>; <math>p = 0.01</math>), pharmacokinetic parameters/AUC (<math>r = 0.41</math>; <math>p = 0.05</math>).</p> <p>The TNS©-PV positively correlated with the CTCAE and Balis grading scale scores (<math>r</math> range = 0.46 - 0.52; <math>p = 0.01</math>).</p> <p>The CTCAE sensory and Balis motor grading scale scores positively correlated with vincristine dosage (<math>r = 0.31</math>, <math>p = 0.05</math>; <math>r = 0.35</math>, <math>p = 0.05</math>, respectively).</p> <p>Grading scale scores did not correlate with pharmacokinetic parameters/AUC</p> <p>FACES scores positively correlated with the TNS-PV neuropathic pain item (<math>r = 0.48</math>; <math>p = 0.01</math>).</p> | <p><b>Sensitivity:</b> Supported based on scores from the following measures which encompassed the entire score range:<br/>- All TNS©-PV items<br/>- Balis motor scores<br/>- FACES pain scores</p> <p><b>Responsiveness:</b><br/>- TNS©-PV was responsive to change based on statistically significant changes over time (<math>p &lt; 0.0001</math>) and moderate <i>es</i> (.49)<br/>- CTCAE (sensory) was responsive to change based on statistically significant changes over time (<math>p &lt; 0.0001</math>) and a moderate <i>es</i> (.48)</p> <p>Because the vibration and reflex items were the most responsive TNS-PV items, a 2-item TNS-PV total score was computed (V-Rex). The simpler 2-item V-Rex was the most responsive measure VIPN measure (<math>p &lt; 0.0001</math>; <i>es</i> = 0.65).</p> <p><b>Feasibility:</b><br/>- Vibration &amp; temperature sensibility scores were not attainable in 84% and 87% of children <math>\leq</math> 3 years of age, respectively<br/>- Reflex &amp; strength scores attainable in 91% and 78% of children <math>\leq</math> 3 years of age, respectively<br/>- FACES scores attainable in 95%<br/>- TNS©-PV scores attainable in nearly all children <math>\geq</math> 6 years of age</p> | <ol style="list-style-type: none"> <li>1) Findings are only generalizable to patients with ALL who are receiving vincristine</li> <li>2) No control group</li> <li>3) Retrospective data collection was used to obtain laryngeal and constipation scores (children/parents were asked if experienced over the past week)</li> <li>4) TNS©-PV use requires assessor training and may not be feasible for use in busy clinical settings</li> <li>5) Lack of control for non-CIPN pain, obesity, steroid-induced myopathy, and genetics.</li> </ol> |
|-------------------------------|------------------------------------------------------------------------------------------------------------------------------------------------------------------------------------------------------------------------------------------------------------------|-------------------------------------------------------------------------------------------------------------------------------------------------------------------------------------------------------------------------------------------------------------------------------------------------|------------------------------------------------------------------|-------------------------------------------------------------------------------------------------------------------------------------------------------------------------------------------------------------------------------------------------------------------------------------------------------------------------------------------------------------------------------------------------------------------------------------------------------------------------------------------------------------------------------------------------------------------------------------------------------------------------------------------------------------------------------------------------------------------------------------------------------------------------------------------------------------------------------------------------------------------------------------------------------------------------------------------------------------------------------------------------------------------------------------------------------------------------------------------------------------------------------------------------------------------------------------------------|------------------------------------------------------------------------------------------------------------------------------------------------------------------------------------------------------------------------------------------------------------------------------------------------------------------------------------------------------------------------------------------------------------------------------------------------------------------------------------------------------------------------------------------------------------------------------------------|-----------------------------------------------------------------------------------------------------------------------------------------------------------------------------------------------------------------------------------------------------------------------------------------------------------------------------------------------------------------------------------------------------------------------------------------------------------------------------------------------------------------------------------------------------------------------------------------------------------------------------------------------------------------------------------------------------------------------------------------------------------------------------------------------------------------------------------------------------------------|---------------------------------------------------------------------------------------------------------------------------------------------------------------------------------------------------------------------------------------------------------------------------------------------------------------------------------------------------------------------------------------------------------------------------------------------------------------------------------------------------------------------------------------------------------------------------------------------------------------------------------------------------------------------------------------------------------------------------------------------------------------------------------------------------------------------------------------------------------------------------------------------------------------------------------------------------------------------------------------------------------------------------------------------------------------------------------------------------------------------------------------------------------------------------------------------------------------------------------------------------------|--------------------------------------------------------------------------------------------------------------------------------------------------------------------------------------------------------------------------------------------------------------------------------------------------------------------------------------------------------------------------------------------------------------------------------------------------------------------------------------------------------------------------------------------------|

|                          |                                                                                                                                                                                                                                                                              |                                                                                                                                                                                                                                                                                                                                                                                 |                                                                                                                                      |                                                                                                                                                                                                                                                                                                                                                                                                                                                                                                                                                                                                                                                                                                                                   |    |                                                                                                                                                                                                                                                                                            |    |                                                                                                                                                                                                                                                                                                                                                                                                                                                                                                                                                                                                                                                                                                                             |
|--------------------------|------------------------------------------------------------------------------------------------------------------------------------------------------------------------------------------------------------------------------------------------------------------------------|---------------------------------------------------------------------------------------------------------------------------------------------------------------------------------------------------------------------------------------------------------------------------------------------------------------------------------------------------------------------------------|--------------------------------------------------------------------------------------------------------------------------------------|-----------------------------------------------------------------------------------------------------------------------------------------------------------------------------------------------------------------------------------------------------------------------------------------------------------------------------------------------------------------------------------------------------------------------------------------------------------------------------------------------------------------------------------------------------------------------------------------------------------------------------------------------------------------------------------------------------------------------------------|----|--------------------------------------------------------------------------------------------------------------------------------------------------------------------------------------------------------------------------------------------------------------------------------------------|----|-----------------------------------------------------------------------------------------------------------------------------------------------------------------------------------------------------------------------------------------------------------------------------------------------------------------------------------------------------------------------------------------------------------------------------------------------------------------------------------------------------------------------------------------------------------------------------------------------------------------------------------------------------------------------------------------------------------------------------|
| Wright 2017 <sup>7</sup> | <p><u>Design:</u><br/>Descriptive, cross-sectional, case control</p> <p>The purpose of this study was to describe the gait characteristics of children and youth treated for CIPN due to vincristine treatment for ALL compared to healthy controls using 3-DMA and EMG.</p> | <p><u>Children with Cancer:</u> <math>N = 17</math><br/>- ALL diagnosis<br/>- &gt; 5 years of age:<br/><math>\bar{X}</math> age = 11.2 years<br/>- CTCAE CIPN grades <math>\geq 1</math></p> <p><u>Healthy Controls:</u><br/><math>N = 10</math></p> <p>Therapy: received (<math>n = 10</math>) or currently receiving (<math>n = 7</math>) standardized vincristine dosing</p> | Temporal-spatial, kinematic, and kinetic data obtained using 3-DMA, EMG, goniometer, strength (MRC) examinations, and hopping scores | <p>*Subjects performed a minimum of six barefoot walking trials along an eight-meter walkway. A 3-DMA camera/software system recorded each walking trial.</p> <p>Simultaneous surface EMG data were collected during the walking trials.</p> <p>Passive ankle dorsiflexion range-of-motion was measured using a goniometer.</p> <p>Dorsiflexor strength was measured using MRC guidelines.</p> <p>Plantarflexor strength was based on unipedal hopping scores.</p> <p>Gait Deviation Index was used to quantify magnitude of gait deviation</p> <p><u>Construct Validity:</u><br/>Contrasting group validity was assessed via comparisons of CIPN cases with healthy control data, and analyzed using chi-square and t-tests.</p> | NA | <p><u>Construct validity:</u><br/>Contrasting group validity: supported by statistically significant differences between CIPN cases and healthy controls in 1) various stages of knee, plantar-, and dorsi-flexion; 2) hip extension; 3) step length; and 4) ankle movement and power.</p> | NA | <ol style="list-style-type: none"> <li>1) Cross-sectional design prevented assessment of responsiveness to change.</li> <li>2) Insensitive measure (CTCAE) used to define presence of CIPN</li> <li>3) Evaluator training or fidelity procedures are not described</li> <li>4) No power analysis</li> <li>5) Risk of type 1 and 2 error due to multiple testing and small sample size.</li> <li>6) It is unclear which data in Table 1 were obtained from 3-DMA, versus the other testing approaches (goniometer, MRC testing hopping scores).</li> <li>7) Lack of control for obesity, steroid-induced myopathy, and genetics.</li> <li>8) Lengthy test battery that requires patient attention and cooperation</li> </ol> |
|--------------------------|------------------------------------------------------------------------------------------------------------------------------------------------------------------------------------------------------------------------------------------------------------------------------|---------------------------------------------------------------------------------------------------------------------------------------------------------------------------------------------------------------------------------------------------------------------------------------------------------------------------------------------------------------------------------|--------------------------------------------------------------------------------------------------------------------------------------|-----------------------------------------------------------------------------------------------------------------------------------------------------------------------------------------------------------------------------------------------------------------------------------------------------------------------------------------------------------------------------------------------------------------------------------------------------------------------------------------------------------------------------------------------------------------------------------------------------------------------------------------------------------------------------------------------------------------------------------|----|--------------------------------------------------------------------------------------------------------------------------------------------------------------------------------------------------------------------------------------------------------------------------------------------|----|-----------------------------------------------------------------------------------------------------------------------------------------------------------------------------------------------------------------------------------------------------------------------------------------------------------------------------------------------------------------------------------------------------------------------------------------------------------------------------------------------------------------------------------------------------------------------------------------------------------------------------------------------------------------------------------------------------------------------------|

NA = not applicable:  $\bar{X}$  = mean



## References

- 1 Gilchrist, LS, Tanner L, Hooke MC. Measuring chemotherapy-induced peripheral neuropathy in children: development of the Ped-mTNS and pilot study results. *Rehabil Oncol* 2009; 27: 7–15.
- 2 Gilchrist LS, Tanner L. The pediatric-modified total neuropathy score: a reliable and valid measure of chemotherapy-induced peripheral neuropathy in children with non-CNS cancers. *Support Care Cancer* 2013; 21: 847–56.
- 3 Gilchrist LS, Marais L, Tanner L. Comparison of two chemotherapy-induced peripheral neuropathy measurement approaches in children. *Support Care Cancer* 2014; 22: 359–66.
- 4 Gilchrist LS, Tanner LR. Short-term recovery of balance control: association with chemotherapy-induced peripheral neuropathy in pediatric oncology. *Pediatr Phys Ther* 2018; 30: 119–24.
- 5 Lieber S, Blankenburg M, Apel K, Hirschfeld G, Hernáiz Driever P, Reindl T. Small-fiber neuropathy and pain sensitization in survivors of pediatric acute lymphoblastic leukemia. *Eur J Paediatr Neurol* 2018; 22: 457–69.
- 6 Lavoie Smith EM, Li L, Hutchinson RJ, et al. Measuring vincristine-induced peripheral neuropathy in children with acute lymphoblastic leukemia. *Cancer Nurs* 2013; 36: E49–60.
- 7 Wright MJ, Twose DM, Gorter JW. Gait characteristics of children and youth with chemotherapy induced peripheral neuropathy following treatment for acute lymphoblastic leukemia. *Gait Posture* 2017; 58: 139–45.
